# Supplementary material
Source: PubMed Central journal article supplement (PMC3623243)

**Anaerobic Sulfur Metabolism Coupled to Dissimilatory Iron Reduction in the  
Extremophile *Acidithiobacillus ferrooxidans***

Héctor Osorio, Stefanie Mangold, Yann Denis, Ivan Ñancuqueo, D. Barrie Johnson,  
Violaine Bonnefoy, Mark Dopson, and David S. Holmes

**Supplemental Material Below**

**TABLE S1**

**TABLE S2**

**TABLE S3**

**FIG. S1**

**FIG. S2**

**FIG. S3**

**Table S1.** Genes interrogated by qPCR and their respective PCR primers.

| Gene                   | Primer (5' to 3')         |
|------------------------|---------------------------|
| <i>sreA</i> (forward)  | ATGAGGACTTTCTCGTCAGCCACA  |
| <i>sreA</i> (reverse)  | TGCTGCCTTGCAGATTGTAGTTGC  |
| <i>sreB</i> (forward)  | TTGCCAAGCCTGTGCC          |
| <i>sreB</i> (reverse)  | TCCAGGTGGCGCCAG           |
| <i>sreC</i> (forward)  | GCCTTTGTTACCGTTTCC        |
| <i>sreC</i> (reverse)  | CAGGACCAGGGCAGGAAG        |
| <i>sreD</i> (reverse)  | GGCAATCCCTGAATGGC         |
| <i>rpoC</i> (forward)  | AATGCGGTGTTGAGGTAACC      |
| <i>rpoC</i> (reverse)  | AGGTACTGGTCTTCGGTAAG      |
| <i>cbbL2</i> (forward) | ACGTCTTCGGCTTCAAGGCG      |
| <i>cbbL2</i> (reverse) | GCAGGCGCGACCATAGTTCTT     |
| <i>cbbS1</i> (forward) | TAGAACATAACCGAACCGGAAAACG |
| <i>cbbS1</i> (reverse) | GCCCCGATAGACTACCAGGGAAG   |
| <i>cbbp</i> (forward)  | AGACACCATCCTGCGCCGTAT     |
| <i>cbbp</i> (reverse)  | GCAGGAGGGTGGGGAAATTCT     |
| <i>fba</i> (forward)   | ATCAGGCCCTCATTCTGCAGC     |
| <i>fba</i> (reverse)   | GATCCATCTGGCAGGTCACACC    |

**Table S2.** Protein expression data from cytoplasmic and membrane enriched fractions of *Acidithiobacillus ferrooxidans*<sup>T</sup> grown in anaerobic and aerobic conditions.

| Spot ID <sup>a</sup>                      | Protein name | Predicted function                                             | Accession <sup>b</sup> | Anova p-value <sup>c</sup> | Fold change <sup>d</sup> | Mowse score <sup>e</sup> | Sequence coverage [%] <sup>f</sup> | MW [Da] <sup>g</sup> | IP <sup>h</sup> |
|-------------------------------------------|--------------|----------------------------------------------------------------|------------------------|----------------------------|--------------------------|--------------------------|------------------------------------|----------------------|-----------------|
| <b>Up-regulated in aerobic conditions</b> |              |                                                                |                        |                            |                          |                          |                                    |                      |                 |
| <b>Energy metabolism</b>                  |              |                                                                |                        |                            |                          |                          |                                    |                      |                 |
| 60                                        | HdrB         | Heterodisulfide reductase subunit B, homolog                   | AFE_2586               | 0.001                      | 9.4                      | 86                       | 18                                 | 50976                | 5.88            |
| 61                                        | HdrB         | Heterodisulfide reductase subunit B, homolog                   | AFE_2586               | 0.004                      | 13.5                     | 74                       | 18                                 | 50976                | 5.88            |
| 45                                        | HdrA         | Pyridine nucleotide-disulfide oxidoreductase                   | AFE_2553               | 0.018                      | 3.3                      | 133                      | 35                                 | 37657                | 5.58            |
| 47                                        | HdrA         | Pyridine nucleotide-disulfide oxidoreductase                   | AFE_2553               | 0.004                      | 8.1                      | 128                      | 36                                 | 37657                | 5.58            |
| 49                                        | Opr          | Conserved hypothetical protein (clusters with TetH)            | AFE_0030               | 0.005                      | 8.5                      | 108                      | 18                                 | 43573                | 7.85            |
| 34                                        | Orf2         | Conserved hypothetical protein (clusters with Hdr)             | AFE_2552               | 0.012                      | 5.4                      | 67                       | 26                                 | 32473                | 5.82            |
| 59                                        | AtpD         | ATP synthase F1, $\beta$ subunit [3.6.3.14]                    | AFE_3203               | 0.029                      | 2.3                      | 101                      | 37                                 | 50564                | 5.01            |
| 68 <sup>i</sup>                           | AtpA         | ATP synthase F1, $\alpha$ subunit [3.6.3.14]                   | AFE_3205               | 0.019                      | 2.1 <sup>i</sup>         | 91 <sup>i</sup>          | 33 <sup>i</sup>                    | 55570                | 5.28            |
| 68 <sup>i</sup>                           | NtrX         | Putative nitrogen assimilation regulatory protein <sup>i</sup> | AFE_0024               | 0.019                      | 2.1 <sup>i</sup>         | 129 <sup>i</sup>         | 41 <sup>i</sup>                    | 51934                | 5.22            |
| 58                                        | Cyc2         | Outer membrane cytochrome <i>c</i> , Cyc2                      | AFE_3153               | 0.013                      | 5.6                      | 69                       | 20                                 | 52358                | 5.54            |
| <b>Carbon management</b>                  |              |                                                                |                        |                            |                          |                          |                                    |                      |                 |
| 5                                         | RfbA         | Glucose-1-phosphate thymidyltransferase [2.7.7.24]             | AFE_3295               | 0.010                      | 2.8                      | 181                      | 48                                 | 32314                | 5.24            |
| 14                                        | Fba          | Fructose-bisphosphate aldolase, class II [4.1.2.13]            | AFE_3248               | 0.023                      | 2.7                      | 89                       | 27                                 | 38366                | 5.76            |
| 38                                        | DhnA         | Fructose-bisphosphate aldolase, putative                       | AFE_1802               | 0.002                      | 4.9                      | 139                      | 51                                 | 32912                | 5.77            |
| 50                                        | Fba          | Fructose-bisphosphate aldolase, class II [4.1.2.13]            | AFE_3248               | 0.005                      | 3.4                      | 192                      | 58                                 | 38366                | 5.76            |
| 51                                        | Fba          | Fructose-bisphosphate aldolase, class II [4.1.2.13]            | AFE_3248               | 0.022                      | 3.0                      | 170                      | 45                                 | 38366                | 5.76            |
| 93                                        | PdhB2        | Dehydrogenase complex, E1 component, $\beta$ subunit           | AFE_1812               | 0.015                      | unique <sup>i</sup>      | 125                      | 47                                 | 36335                | 5               |
| 94                                        | PdhB2        | Dehydrogenase complex, E1 component, $\beta$ subunit           | AFE_1812               | 0.001                      | unique <sup>i</sup>      | 140                      | 49                                 | 36335                | 5               |
| 42                                        | PdhB         | Pyruvate dehydrogenase, E1 component, $\beta$ subunit          | AFE_3069               | 0.020                      | 2.4                      | 139                      | 38                                 | 35568                | 5.36            |
| 52                                        | PdhB         | Pyruvate dehydrogenase, E1 component, $\alpha$ subunit         | AFE_1813               | 0.005                      | 7.1                      | 115                      | 27                                 | 38960                | 5.51            |
| 53                                        | PmbA         | Regulates CrsA in carbon storage                               | AFE_0600               | 0.022                      | 2.1                      | 136                      | 25                                 | 47568                | 5.55            |
| 55                                        | Icd          | NADP-dependent isocitrate dehydrogenase [1.1.1.42]             | AFE_0424               | 0.007                      | 2.2                      | 94                       | 17                                 | 45756                | 5.64            |
| 65                                        | CbbL2        | RuBisCo, large subunit 2 [4.1.1.39]                            | AFE_2155               | 0.017                      | 2.9                      | 176                      | 43                                 | 50351                | 5.69            |
| 69                                        | Pgi          | Glucose-6-phosphate isomerase [5.3.1.9]                        | AFE_2924               | 0.018                      | 10.9                     | 142                      | 30                                 | 59405                | 6.04            |
| 78                                        | Rpe          | Ribulose-phosphate 3-epimerase [5.1.3.1]                       | AFE_3247               | 0.004                      | 2.5                      | 97                       | 37                                 | 23537                | 5.16            |
| 79                                        | Tal          | Transaldolase [2.2.1.2]                                        | AFE_0419               | 0.007                      | 2.2                      | 184                      | 55                                 | 39495                | 5.4             |

|    |       |                                                   |          |       |     |     |     |       |      |
|----|-------|---------------------------------------------------|----------|-------|-----|-----|-----|-------|------|
| 81 | Tkt-1 | Transketolase [2.2.1.1]                           | AFE_1843 | 0.007 | 2.1 | 129 | 20  | 74156 | 5.9  |
| 82 | Xfp   | Transketolase pyridine binding domain protein     | AFE_1667 | 0.002 | 4.0 | 154 | 23  | 77857 | 5.75 |
| 83 | Xfp   | Transketolase pyridine binding domain protein     | AFE_1667 | 0.007 | 7.0 | 106 | 20  | 77857 | 5.75 |
| 85 | GlgB  | 1,4- $\alpha$ -glucan branching enzyme [2.4.1.18] | AFE_2836 | 0.018 | 4.6 | 85  | 17  | 83489 | 5.47 |
| 35 | FghA  | Esterase, putative/S-formylglutathione hydrolase  | AFE_0698 | 0.016 | 3.9 | 84  | 26  | 31433 | 5.84 |
| 44 | Hdh   | 2-hydroxyacid dehydrogenase family protein        | AFE_3161 | 0.034 | 4.2 | 34  | 109 | 36359 | 5.59 |
| 39 | PfkB  | Carbohydrate kinase, PfkB family                  | AFE_0530 | 0.011 | 2.0 | 61  | 21  | 34507 | 5.41 |

#### Cell wall/membrane/envelope biogenesis

|                |             |                                                |               |       |                  |                 |                 |             |           |
|----------------|-------------|------------------------------------------------|---------------|-------|------------------|-----------------|-----------------|-------------|-----------|
| 7 <sup>i</sup> | FadB        | Malonyl CoA-acyl carrier protein transacylase  | AFE_1907      | 0.029 | 2.0 <sup>i</sup> | 54 <sup>i</sup> | 38 <sup>i</sup> | 33459       | 5.42      |
| 1              | Lpp         | Lipoprotein, putative                          | AFE_2811      | 0.030 | 2.2              | 65              | 48              | 10247       | 9.42      |
| 2              | OmpA        | Peptidoglycan-associated lipoprotein, putative | AFE_0071      | 0.011 | 2.2              | 90              | 39              | 19589       | 6.4       |
| 11             | OmpA        | Peptidoglycan-associated lipoprotein, putative | AFE_0071      | 0.012 | 4.1              | 122             | 39              | 19589       | 6.4       |
| 41             | Gmd-1/Gmd-2 | GDP-mannose 4,6-dehydratase                    | AFE_2977/3292 | 0.009 | 8.0              | 149/148         | 36              | 37986/38443 | 6.2/5.089 |
| 43             | Gmd-1/Gmd-2 | GDP-mannose 4,6-dehydratase                    | AFE_2977/3292 | 0.002 | 2.5              | 167/166         | 42              | 37986/38443 | 6.2/5.089 |

#### Post-translational modification/protein turnover/chaperone functions and Inorganic ion transport and metabolism

|                |       |                                             |          |        |                     |                  |                 |       |      |
|----------------|-------|---------------------------------------------|----------|--------|---------------------|------------------|-----------------|-------|------|
| 4              | AhpC  | Antioxidant, AhpC-Tsa family                | AFE_0985 | 0.042  | 2.0                 | 95               | 39              | 22363 | 5.69 |
| 7 <sup>i</sup> | GroEL | Chaperonin, 60 kDa                          | AFE_0542 | 0.029  | 2.0 <sup>i</sup>    | 114 <sup>i</sup> | 41 <sup>i</sup> | 58594 | 5.2  |
| 8              | DeqQ  | Serine protease, DO-DeqQ family             | AFE_2849 | 0.045  | 2.0                 | 67               | 17              | 53366 | 7.3  |
| 9              | DeqQ  | Serine protease, DO-DeqQ family             | AFE_2849 | 0.040  | 2.4                 | 66               | 17              | 53366 | 7.3  |
| 10             | HscA  | Fe-S protein assembly chaperone             | AFE_0677 | 0.021  | 6.2                 | 129              | 33              | 66023 | 5.09 |
| 13             | GroEL | Chaperonin, 60 kDa                          | AFE_0542 | 0.029  | 2.1                 | 89               | 21              | 58594 | 5.2  |
| 15             | AhpC  | Antioxidant, AhpC-Tsa family                | AFE_0985 | 3.4e-5 | unique <sup>j</sup> | 60               | 28              | 22363 | 5.69 |
| 31             | AhpC  | Antioxidant, AhpC-Tsa family                | AFE_0985 | 0.015  | 6.7                 | 152              | 73              | 22363 | 5.69 |
| 32             | SspA  | Stringent starvation protein A              | AFE_0221 | 0.024  | 2.2                 | 89               | 38              | 23506 | 5.67 |
| 66             | AldA  | Aldehyde dehydrogenase (NAD) family protein | AFE_2131 | 0.003  | 3.1                 | 168              | 33              | 55325 | 5.13 |
| 67             | AldA  | Aldehyde dehydrogenase (NAD) family protein | AFE_2131 | 0.006  | 4.1                 | 106              | 30              | 55325 | 5.13 |
| 74             | GroEL | Chaperonin, 60 kDa                          | AFE_0542 | 0.005  | 2.8                 | 145              | 36              | 58594 | 5.2  |
| 75             | DnaK  | Chaperone protein Dnak                      | AFE_2665 | 0.002  | 3.3                 | 167              | 33              | 68180 | 5.04 |
| 91             | GstA  | Glutathione S-transferase family protein    | AFE_0177 | 0.001  | unique <sup>j</sup> | 71               | 29              | 22082 | 5.31 |
| 95             | HscA  | Fe-S protein assembly chaperone             | AFE_0677 | 3.9e-4 | unique <sup>j</sup> | 57               | 14              | 66023 | 5.09 |
| 30             | Sod   | Superoxide dismutase [1.15.1.1]             | AFE_1898 | 0.002  | 9.3                 | 93               | 31              | 22934 | 6.05 |

#### Translation, transcription, and cell cycle

|    |      |                              |          |       |      |     |    |       |      |
|----|------|------------------------------|----------|-------|------|-----|----|-------|------|
| 6  | PspA | Phage shock protein A (IM30) | AFE_2017 | 0.002 | 2.4  | 101 | 42 | 26454 | 4.87 |
| 33 | RplY | Ribosomal protein L25        | AFE_2145 | 0.008 | 11.5 | 52  | 14 | 22124 | 5.86 |

|                                            |             |                                                                                   |                       |        |                     |                 |                 |        |      |
|--------------------------------------------|-------------|-----------------------------------------------------------------------------------|-----------------------|--------|---------------------|-----------------|-----------------|--------|------|
| 37                                         | Tsf         | Translation elongation factor Ts                                                  | AFE_1445              | 4.7e-4 | 13.4                | 113             | 43              | 31227  | 5.13 |
| 46                                         | RpoA        | DNA-directed RNA polymerase, $\alpha$ -subunit                                    | AFE_0354              | 0.041  | 7.4                 | 212             | 34              | 36941  | 5.2  |
| 56                                         | Tuf-1/Tuf-2 | Translation elongation factor Tu                                                  | AFE_0325/0311         | 0.003  | 4.7                 | 167             | 44              | 43152  | 5.35 |
| 57                                         | Tuf-1/Tuf-2 | Translation elongation factor Tu                                                  | AFE_0325/0311         | 0.005  | 3.0                 | 120             | 36              | 43152  | 5.35 |
| 63 <sup>i</sup>                            | SerS        | Seryl-tRNA synthetase [6.1.1.11]                                                  | AFE_0380              | 0.001  | 3.0 <sup>i</sup>    | 83 <sup>i</sup> | 28 <sup>i</sup> | 46529  | 5.76 |
| 76                                         | ThrS        | Threonyl-tRNA synthetase [6.1.1.3]                                                | AFE_2614              | 0.011  | 3.0                 | 115             | 17              | 72519  | 5.56 |
| 77                                         | GlyS        | Glycyl-tRNA synthetase, $\beta$ -subunit [6.1.1.14]                               | AFE_2581              | 0.016  | 2.5                 | 175             | 25              | 76381  | 5.87 |
| 80                                         | FtsA        | Cell division protein                                                             | AFE_0201              | 0.055  | 3.2                 | 113             | 26              | 44997  | 5.45 |
| 84                                         | Pnp         | Polyribonucleotide nucleotidyltransferase [2.7.7.8]                               | AFE_0395              | 0.016  | 2.5                 | 135             | 39              | 74344  | 5.72 |
| 87                                         | FusA        | Translation elongation factor G                                                   | AFE_0324              | 0.026  | 2.2                 | 189             | 26              | 76507  | 5.13 |
| 88                                         | FusA        | Translation elongation factor G                                                   | AFE_0324              | 0.035  | 1.7                 | 180             | 30              | 76507  | 5.13 |
| 97                                         | RpoB        | DNA-directed RNA polymerase, $\beta$ -subunit [2.7.7.6]                           | AFE_0320              | 0.009  | unique <sup>j</sup> | 178             | 18              | 15167  | 5.42 |
| 99                                         | AlaS        | alanyl-tRNA synthetase [6.1.1.7]                                                  | AFE_0934              | 0.001  | unique <sup>j</sup> | 145             | 29              | 95466  | 5.32 |
| <b>Amino acid metabolism and transport</b> |             |                                                                                   |                       |        |                     |                 |                 |        |      |
| 16                                         | MetZ        | O-succinylhomoserine sulfhydrylase [4.2.99.-]                                     | AFE_2063              | 5.5e-7 | unique <sup>j</sup> | 79              | 30              | 43586  | 6.19 |
| 40                                         | IlvC        | Ketol-acid reductoisomerase [1.1.1.86]                                            | AFE_0747              | 0.045  | 2.1                 | 175             | 40              | 36393  | 6.02 |
| 48                                         | LeuB        | 3-isopropylmalate dehydrogenase [1.1.1.85]                                        | AFE_2075              | 0.010  | 6.3                 | 104             | 31              | 38384  | 5.04 |
| 64                                         | PepA        | Cytosol aminopeptidase [3.4.11.1]                                                 | AFE_2201              | 0.002  | 9.7                 | 92              | 31              | 52811  | 5.3  |
| 70                                         | SerA        | D-3-phosphoglycerate dehydrogenase [1.1.1.95]                                     | AFE_0896              | 0.008  | 2.0                 | 142             | 35              | 56028  | 5.69 |
| 71                                         | GlnA        | Glutamine synthetase, type I [6.3.1.2]                                            | AFE_0466              | 0.002  | 7.8                 | 114             | 25              | 51743  | 5.1  |
| 72                                         | GlnA        | Glutamine synthetase, type I [6.3.1.2]                                            | AFE_0466              | 0.017  | 8.1                 | 155             | 31              | 51743  | 5.1  |
| 73                                         | IlvD-2      | Dihydroxy-acid dehydratase [4.2.1.9]                                              | AFE_0662              | 0.010  | 2.2                 | 140             | 22              | 65364  | 6.21 |
| 86                                         | MetE        | 5-methyltetrahydropteroyltriglutamate-homocysteine S-methyltransferase [2.1.1.14] | AFE_0288              | 0.005  | 10.3                | 102             | 22              | 87873  | 5.86 |
| 90                                         | IscS-3      | Cysteine desulfurase IscS [4.4.1.-]                                               | AFE_0673              | 4.4e-4 | 3.4                 | 71              | 15              | 45174  | 5.85 |
| 100                                        | PyrA        | Conserved hypothetical protein                                                    | AFE_0004              | 0.003  | unique <sup>j</sup> | 61              | 11              | 129489 | 5.92 |
| <b>Nucleotide metabolism and Transport</b> |             |                                                                                   |                       |        |                     |                 |                 |        |      |
| 62                                         | PurA        | Adenylosuccinate synthetase [6.3.4.4]                                             | AFE_1889              | 0.010  | 4.9                 | 126             | 31              | 46428  | 5.73 |
| 63 <sup>i</sup>                            | PurD        | Phosphoribosylamine-glycine ligase [6.3.4.13]                                     | AFE_2261              | 0.001  | 3.0 <sup>i</sup>    | 56 <sup>i</sup> | 29 <sup>i</sup> | 44316  | 6.08 |
| <b>Other proteins</b>                      |             |                                                                                   |                       |        |                     |                 |                 |        |      |
| 3                                          | TtgA        | Toluene tolerance protein, putative                                               | AFE_1830              | 0.006  | 2.6                 | 94              | 44              | 25160  | 9.07 |
| 12                                         | TtgB        | Toluene tolerance protein, putative                                               | AFE_0161              | 0.024  | 3.2                 | 83              | 47              | 23455  | 9.33 |
| 36                                         | YbjQ        | Conserved domain protein                                                          | AFE_2019              | 1.1e-4 | 2.2                 | 134             | 38              | 36503  | 6.46 |
| 54                                         | PyrB        | Pyridine nucleotide-disulfide oxidoreductase                                      | AFE_2601/<br>AFE_3118 | 0.040  | 6.5                 | 127             | 35              | 42226  | 6.19 |
| 89                                         | TypA        | GTP-binding protein TypA                                                          | AFE_2740              | 0.008  | 3.0                 | 194             | 27              | 66924  | 5.26 |

|    |      |                                               |          |        |                     |     |    |       |      |
|----|------|-----------------------------------------------|----------|--------|---------------------|-----|----|-------|------|
| 17 | Trp2 | TPR domain protein                            | AFE_2762 | 2.0e-4 | unique <sup>j</sup> | 56  | 10 | 66424 | 6.21 |
| 92 | Ppa  | Inorganic pyrophosphatase [3.6.1.1]           | AFE_0492 | 0.007  | unique <sup>j</sup> | 79  | 31 | 19125 | 5.07 |
| 96 | Fer1 | Oxidoreductase, molybdopterin binding subunit | AFE_0809 | 0.023  | unique <sup>j</sup> | 108 | 14 | 83660 | 6.02 |
| 98 | Fer1 | Oxidoreductase, molybdopterin binding subunit | AFE_0809 | 0.003  | unique <sup>j</sup> | 73  | 12 | 83660 | 6.02 |

### Up-regulated in anaerobic conditions

#### Cell wall/membrane/envelope biogenesis

|     |      |                                                                       |          |       |                     |     |    |       |      |
|-----|------|-----------------------------------------------------------------------|----------|-------|---------------------|-----|----|-------|------|
| 103 | AmpC | Metallo-β-lactamase family protein (clusters with Sqr)                | AFE_0269 | 0.011 | 5.4                 | 158 | 74 | 25102 | 5.43 |
| 105 | SreB | Sulfur reductase, iron-sulfur binding subunit                         | AFE_2178 | 0.040 | unique <sup>j</sup> | 53  | 57 | 22991 | 4.85 |
| 104 | AtpF | ATP synthase F <sub>0</sub> , b subunit [3.6.3.14]                    | AFE_3207 | 0.001 | unique <sup>j</sup> | 57  | 31 | 17888 | 6.77 |
| 19  | ThiJ | 4-methyl-5(B-hydroxyethyl)-thiazole monophosphate biosynthesis enzyme | AFE_0523 | 0.008 | 3.0                 | 54  | 35 | 21501 | 4.73 |

#### Carbon management

|     |       |                                      |          |       |                     |     |    |       |      |
|-----|-------|--------------------------------------|----------|-------|---------------------|-----|----|-------|------|
| 18  | CbbS1 | RuBisCo, small subunit [4.1.1.39]    | AFE_1690 | 0.047 | 3.8                 | 68  | 62 | 12869 | 5.9  |
| 23  | CscE  | Carboxysome shell peptide            | AFE_1683 | 0.044 | 3.1                 | 118 | 66 | 11357 | 5.25 |
| 25  | p30   | p30 protein containing a CBBQ domain | AFE_1678 | 0.036 | 2.4                 | 98  | 33 | 29643 | 5.3  |
| 27  | p30   | p30 protein containing a CBBQ domain | AFE_1678 | 0.003 | unique <sup>j</sup> | 58  | 30 | 29643 | 5.3  |
| 22  | AcnA  | Aconitate hydratase, putative        | AFE_0423 | 0.020 | 2.0                 | 65  | 18 | 68181 | 5.84 |
| 101 | Bfr   | Bacterioferritin                     | AFE_1682 | 0.029 | 4.5                 | 68  | 40 | 16741 | 5.22 |
| 21  | ManB  | Phosphomannomutase, putative         | AFE_0943 | 0.016 | 3.0                 | 56  | 18 | 51733 | 5.45 |

#### Cell wall/membrane/envelope biogenesis

|     |     |                                                                          |          |        |                     |    |    |       |      |
|-----|-----|--------------------------------------------------------------------------|----------|--------|---------------------|----|----|-------|------|
| 20  | Tat | Tat (twin-arginine translocation) pathway signal sequence domain protein | AFE_0042 | 0.001  | 2.2                 | k  | k  | 29455 | 6.61 |
| 26  | Tat | Tat (twin-arginine translocation) pathway signal sequence domain protein | AFE_0042 | 1.3e-6 | unique <sup>j</sup> | k  | k  | 29455 | 6.61 |
| 102 | Slp | Outer membrane lipoprotein Slp, putative                                 | AFE_2316 | 0.003  | 4.2                 | 80 | 47 | 19169 | 8.44 |

#### Amino acid metabolism and transport

|    |        |                                      |          |        |                     |     |    |       |      |
|----|--------|--------------------------------------|----------|--------|---------------------|-----|----|-------|------|
| 24 | IlvD-1 | Dihydroxy-acid dehydratase [4.2.1.9] | AFE_1673 | 0.011  | 7.4                 | 102 | 20 | 58522 | 6.04 |
| 29 | IlvD-1 | Dihydroxy-acid dehydratase [4.2.1.9] | AFE_1673 | 4.5e-5 | unique <sup>j</sup> | 66  | 10 | 58522 | 6.04 |

#### Nucleotide metabolism and Transport

|    |     |                                            |          |       |                     |    |    |       |      |
|----|-----|--------------------------------------------|----------|-------|---------------------|----|----|-------|------|
| 28 | Dho | Dihydroorotase, homodimeric type [3.5.2.3] | AFE_1672 | 0.002 | unique <sup>j</sup> | 55 | 27 | 38548 | 6.73 |
|----|-----|--------------------------------------------|----------|-------|---------------------|----|----|-------|------|

<sup>a</sup>Spot IDs refer to the numbers in the supplemental figures.

<sup>b</sup>Annotation No. is that of Genbank genome annotation NC011761.

<sup>c</sup>Anova test was performed for three replicates of each condition and spots with p-values < 0.05 were considered to be significant.

<sup>d</sup>Proteins with fold change  $\geq 2.0$  are regarded as differentially expressed.

<sup>e</sup>Mowse score is generated by Mascot and characterizes the hit of a peptide mass fingerprint (PMF) search giving the probability that the hit is a random match in the database (scores > 47 are significant with a significance threshold of 0.05).

<sup>f</sup>Sequence coverage (generated by Mascot) presents the percentage of the database hit that is covered by the submitted peptide masses of the experimentally acquired PMF.

<sup>g</sup>MW is the predicted molecular weight of the database entry.

<sup>h</sup>The predicted isoelectric point (IP).

<sup>i</sup>The protein spot contains a mixture. No conclusions can be drawn regarding up-regulation of the individual protein. Mowse score and sequence coverage are given for the individual components.

<sup>j</sup>Unique refers to spots present in either aerobic or anaerobic conditions that do not have a matching spot under the other condition (unique spots listed alongside up-regulated proteins under aerobic conditions do not have a match under anaerobic conditions and vice versa).

<sup>k</sup>Spots identified by MS/MS and *de novo* protein sequencing.

**Table S3.** Microarray expression data of *Acidithiobacillus ferrooxidans*<sup>T</sup> grown in aerobic and anaerobic conditions. Some of the reported gene transcripts were <2 fold differentially regulated; however, they have been retained as the results were reproducible and the T-test confirmed that the data were significant.

| Gene name                                                                                                              | Predicted function                                                | Accession <sup>a</sup> | Log <sub>2</sub> ratio median <sup>b</sup> | t-Test (p-value) <sup>c</sup> |
|------------------------------------------------------------------------------------------------------------------------|-------------------------------------------------------------------|------------------------|--------------------------------------------|-------------------------------|
| <b>Up-regulated in aerobic conditions</b>                                                                              |                                                                   |                        |                                            |                               |
| <b>Energy metabolism</b>                                                                                               |                                                                   |                        |                                            |                               |
| <i>tetH</i>                                                                                                            | Tetrathionate hydrolase                                           | AFE_0029               | 4.3                                        | 1.4e-5                        |
| <i>hoxF</i>                                                                                                            | [NiFe] hydrogenase β-subunit, putative                            | AFE_0940               | 1.0                                        | 1.0e-3                        |
| <i>hdrB</i>                                                                                                            | Heterodisulfide reductase subunit B, homolog                      | AFE_2586               | 1.0                                        | 2.0e-3                        |
| <i>nuoI</i>                                                                                                            | NADH-quinone oxidoreductase, subunit I                            | AFE_2622               | 0.7                                        | 0.030                         |
| <i>atpC</i>                                                                                                            | ATP synthase F1, ε-subunit                                        | AFE_3202               | 1.0                                        | 0.044                         |
| <i>tolQ</i>                                                                                                            | MotA/TolQ/ExbB proton channel family protein                      | AFE_0768               | 0.8                                        | 0.001                         |
| <i>cyc1</i>                                                                                                            | Cytochrome <i>c4</i> , <i>Cyc1</i>                                | AFE_3152               | 0.7                                        | 0.040                         |
| <i>cyc2</i>                                                                                                            | Outer membrane cytochrome <i>c</i> , <i>Cyc2</i>                  | AFE_3153               | 0.9                                        | 3.0e-3                        |
| <i>coxA</i>                                                                                                            | Cytochrome <i>c</i> , <i>aa</i> <sub>3</sub> -type, subunit I     | AFE_3149               | 0.9                                        | 0.046                         |
| <i>coxC</i>                                                                                                            | Cytochrome <i>c</i> , <i>aa</i> <sub>3</sub> -type, subunit III   | AFE_3148               | 0.9                                        | 0.025                         |
| <i>rus</i>                                                                                                             | Rusticyanin                                                       | AFE_3146               | 1.7                                        | 0.026                         |
| <i>hynD</i>                                                                                                            | Hydrogenase maturation protease                                   | AFE_3281               | 1.0                                        | 4.0e-3                        |
| <i>hynS</i>                                                                                                            | [NiFe] hydrogenase small subunit                                  | AFE_3283               | 1.3                                        | 4.0e-3                        |
|                                                                                                                        | Quinone interacting membrane-bound oxidoreductase subunit         | AFE_3284               | 1.2                                        | 0.00                          |
| <b>Carbon Management</b>                                                                                               |                                                                   |                        |                                            |                               |
| <i>pgd</i>                                                                                                             | 6-phosphogluconate dehydrogenase                                  | AFE_2025               | 0.9                                        | 0.003                         |
| <i>zwf</i>                                                                                                             | Glucose-6-phosphate 1-dehydrogenase                               | AFE_2024               | 1.2                                        | 0.004                         |
| <i>pdal</i>                                                                                                            | Dehydrogenase complex, E1 component, α subunit                    | AFE_1813               | 0.8                                        | 3.0e-4                        |
| <i>gph-1</i>                                                                                                           | Phosphoglycolate phosphatase                                      | AFE_1823               | 0.7                                        | 0.003                         |
| <i>xfp</i>                                                                                                             | Xylulose-5-phosphate/fructose-6-phosphate phosphoketolase         | AFE_2053               | 0.9                                        | 9.2e-4                        |
| <i>amyA</i>                                                                                                            | α-amylase family protein                                          | AFE_2082               | 1.2                                        | 0.00                          |
|                                                                                                                        | Glycosyl transferase, group 1                                     | AFE_2083               | 0.9                                        | 0.00                          |
| <i>adhP</i>                                                                                                            | Zn-binding alcohol dehydrogenase family protein                   | AFE_2088               | 0.8                                        | 0.00                          |
| <i>pgm</i>                                                                                                             | Phosphoglucomutase                                                | AFE_2324               | 1.0                                        | 0.009                         |
| <i>glgB</i>                                                                                                            | 1,4-α-glucan branching enzyme                                     | AFE_2836               | 0.7                                        | 0.02                          |
| <b>Cell wall/membrane/envelope biogenesis</b>                                                                          |                                                                   |                        |                                            |                               |
| <i>cfa</i>                                                                                                             | Cyclopropane-fatty-acyl-phospholipid synthase domain protein      | AFE_2437               | 0.7                                        | 0.026                         |
| <i>ftsQ</i>                                                                                                            | cell division protein                                             | AFE_0202               | 1.2                                        | 6.4e-4                        |
| <i>ftsI</i>                                                                                                            | peptidoglycan synthetase                                          | AFE_0212               | 1.1                                        | 0.007                         |
| <i>murC</i>                                                                                                            | UDP-N-acetylmuramate--alanine ligase                              | AFE_0205               | 1.1                                        | 0.001                         |
| <i>mraY</i>                                                                                                            | phospho-N-acetylmuramoyl-pentapeptide-transferase                 | AFE_0209               | 0.7                                        | 0.044                         |
| <i>murF</i>                                                                                                            | UDP-N-acetylmuramoyl-tripeptide-D-alanyl-D-alanine ligase         | AFE_0210               | 1.2                                        | 0.003                         |
| <i>murE</i>                                                                                                            | UDP-N-acetylmuramoylalanyl-D-glutamate-2,6-diaminopimelate ligase | AFE_0211               | 1.1                                        | 0.004                         |
| <i>mraW</i>                                                                                                            | S-adenosyl-methyltransferase                                      | AFE_0214               | 1.3                                        | 0.006                         |
| <i>mraZ<sup>d</sup></i>                                                                                                | MraZ protein (function unknown)                                   | AFE_0215               | 1.1                                        | 0.002                         |
| <i>amiC</i>                                                                                                            | N-acetylmuramoyl-L-alanine amidase, putative                      | AFE_2361               | 0.8                                        | 0.002                         |
| <i>mltB</i>                                                                                                            | membrane-bound lytic murein transglycosylase B, putative          | AFE_1827               | 0.8                                        | 0.020                         |
| <b>Post-translational modification/protein turnover/chaperone functions and Inorganic ion transport and metabolism</b> |                                                                   |                        |                                            |                               |
| <i>copB</i>                                                                                                            | copper-translocating P-type ATPase (copB)                         | AFE_2439               | 1.5                                        | 0.001                         |
| <i>copB</i>                                                                                                            | copper-translocating P-type ATPase (copB)                         | AFE_2779               | 1.4                                        | 1.7e-4                        |
| <i>cic</i>                                                                                                             | voltage-gated chloride channel                                    | AFE_3129               | 1.2                                        | 0.002                         |
| <i>clpB</i>                                                                                                            | clpB protein                                                      | AFE_1970               | 1.0                                        | 0.011                         |
| <i>cbpA</i>                                                                                                            | curved DNA-binding protein                                        | AFE_3102               | 0.9                                        | 0.007                         |
| <i>hsp</i>                                                                                                             | heat shock protein, Hsp20 family                                  | AFE_0871               | 1.2                                        | 0.014                         |



|                                                                                                                        |                                                                 |          |     |        |
|------------------------------------------------------------------------------------------------------------------------|-----------------------------------------------------------------|----------|-----|--------|
| <i>hsp</i>                                                                                                             | heat shock protein, Hsp20 family                                | AFE_2086 | 0.9 | 0.001  |
| <i>sod</i>                                                                                                             | superoxide dismutase                                            | AFE_1898 | 1.7 | 9.8e-5 |
| <i>ahpC</i>                                                                                                            | antioxidant, AhpC/Tsa family                                    | AFE_0985 | 1.3 | 0.002  |
| <b>Translation, transcription, and cell cycle</b>                                                                      |                                                                 |          |     |        |
| <i>ftsZ</i>                                                                                                            | cell division protein FtsZ                                      | AFE_0200 | 1.6 | 0.001  |
| <i>ftsA</i>                                                                                                            | cell division protein FtsA                                      | AFE_0201 | 1.4 | 0.001  |
| <i>ftsW</i>                                                                                                            | cell division protein FtsW                                      | AFE_0207 | 0.7 | 0.009  |
| <i>ftsL</i>                                                                                                            | cell division protein FtsL                                      | AFE_0213 | 0.8 | 0.007  |
| <i>ftsB</i>                                                                                                            | septum formation initiator family protein                       | AFE_0850 | 1.3 | 0.003  |
| <i>iscR</i>                                                                                                            | Iron-sulfur cluster assembly transcription factor               | AFE_0672 | 1.2 | 0.024  |
| <i>iscA<sup>d</sup></i>                                                                                                | Iron-sulfur cluster assembly protein                            | AFE_0675 | 1.1 | 0.008  |
| <b>Nucleotide biosynthesis and transport</b>                                                                           |                                                                 |          |     |        |
| <i>guaA</i>                                                                                                            | glutamine amidotransferase, class I                             | AFE_2528 | 0.7 | 0.046  |
| <b>Gene regulation</b>                                                                                                 |                                                                 |          |     |        |
| <i>arsR</i>                                                                                                            | transcriptional regulator, ArsR family                          | AFE_2641 | 0.8 | 6.9e-4 |
| <i>tetR</i>                                                                                                            | transcriptional regulator, TetR family                          | AFE_0255 | 0.9 | 0.002  |
| <b>Up-regulated in anaerobic conditions</b>                                                                            |                                                                 |          |     |        |
| <b>Energy metabolism</b>                                                                                               |                                                                 |          |     |        |
| <i>ubiE</i>                                                                                                            | Ubiquinone/menaquinone biosynthesis methyltransferase           | AFE_0289 | 0.7 | 2.0e-3 |
|                                                                                                                        | NADH:flavin oxidoreductase/NADH oxidase                         | AFE_2211 | 0.7 | 3.0e-3 |
| <i>tusA</i>                                                                                                            | Hypothetical protein (Similar SirA)                             | AFE_2557 | 0.9 | 0.001  |
| <i>drsE</i>                                                                                                            | Pyridine nucleotide-disulphide oxidoreductase (Dsr-like)        | AFE_2556 | 1.3 | 0.004  |
| <i>atpA</i>                                                                                                            | ATP synthase F1, $\alpha$ -subunit                              | AFE_3205 | 0.9 | 0.01   |
| <i>atpF</i>                                                                                                            | ATP synthase F0, $\beta$ -subunit                               | AFE_3207 | 1.5 | 5.0e-3 |
| <i>atpE</i>                                                                                                            | ATP synthase C chain                                            | AFE_3208 | 1.4 | 0.009  |
| <i>pdhA</i>                                                                                                            | Pyruvate dehydrogenase complex, E1 component, $\alpha$ -subunit | AFE_3070 | 0.7 | 1.0e-3 |
| <i>atpB</i>                                                                                                            | ATP synthase F <sub>0</sub> , A subunit                         | AFE_3209 | 1.0 | 0.002  |
| <i>cycA2</i>                                                                                                           | Cytochrome c4, CycA2                                            | AFE_2727 | 0.9 | 0.027  |
| <i>petA2</i>                                                                                                           | Ubiquinol-cytochrome c reductase, iron-sulfur subunit           | AFE_2729 | 0.9 | 0.005  |
| <i>petB2</i>                                                                                                           | Ubiquinol-cytochrome c reductase, cytochrome b subunit          | AFE_2730 | 1.1 | 0.007  |
| <i>cysI</i>                                                                                                            | Sulfite reductase (NADPH) hemoprotein $\beta$ -component        | AFE_3122 | 0.8 | 0.01   |
| <i>cysH</i>                                                                                                            | Adenylylsulfate reductase                                       | AFE_3123 | 1.5 | 0.0    |
| <b>Carbon Management</b>                                                                                               |                                                                 |          |     |        |
| <i>cbbp</i>                                                                                                            | Phosphoribulokinase                                             | AFE_0536 | 0.7 | 0.009  |
| <i>cscC</i>                                                                                                            | Carboxysome shell peptide                                       | AFE_1685 | 1.6 | 0.002  |
| <i>tkt-2</i>                                                                                                           | Transketolase                                                   | AFE_3252 | 0.9 | 0.022  |
| <b>Post-translational modification/protein turnover/chaperone functions and inorganic ion transport and metabolism</b> |                                                                 |          |     |        |
| <i>surA</i>                                                                                                            | Survival protein SurA                                           | AFE_3035 | 1.4 | 0.003  |
| <b>Translation, transcription, and cell cycle</b>                                                                      |                                                                 |          |     |        |
| <i>nusG</i>                                                                                                            | Transcription termination/anti-termination factor               | AFE_0314 | 1.0 | 0.002  |
| <i>fusA</i>                                                                                                            | Translation elongation factor G                                 | AFE_0324 | 1.3 | 0.047  |
| <i>tuf-1</i>                                                                                                           | Elongation factor Tu                                            | AFE_0325 | 1.2 | 4.4e-4 |
| <i>tuf-2</i>                                                                                                           | Elongation factor Tu                                            | AFE_0311 | 1.8 | 3.0e-4 |
| <i>infC</i>                                                                                                            | Translation initiation factor IF-3                              | AFE_2613 | 1.0 | 0.021  |
| <i>yfiA</i>                                                                                                            | Ribosomal subunit interface protein                             | AFE_3024 | 1.1 | 4.3e-5 |
| <i>rplU</i>                                                                                                            | Ribosomal protein L21                                           | AFE_0285 | 1.1 | 0.016  |
| <i>rplK</i>                                                                                                            | Ribosomal protein L11                                           | AFE_0315 | 1.4 | 0.002  |
| <i>rplA</i>                                                                                                            | Ribosomal protein L1                                            | AFE_0316 | 1.1 | 0.001  |
| <i>rpsL</i>                                                                                                            | 30S ribosomal protein S12                                       | AFE_0322 | 1.3 | 0.007  |
| <i>rpsG</i>                                                                                                            | 30S ribosomal protein S7                                        | AFE_0323 | 2.0 | 0.043  |
| <i>rpsJ</i>                                                                                                            | Ribosomal protein S10                                           | AFE_0326 | 1.6 | 0.005  |
| <i>rplC</i>                                                                                                            | Ribosomal protein L3                                            | AFE_0327 | 0.7 | 0.017  |
| <i>rplD</i>                                                                                                            | Ribosomal protein L4                                            | AFE_0328 | 0.8 | 7.9e-4 |
| <i>rpsS</i>                                                                                                            | Ribosomal protein S19                                           | AFE_0331 | 1.6 | 0.006  |

|              |                            |          |     |       |
|--------------|----------------------------|----------|-----|-------|
| <i>rpsM</i>  | Ribosomal protein S13      | AFE_0351 | 1.0 | 0.029 |
| <i>rpsD</i>  | Ribosomal protein S4       | AFE_0353 | 0.8 | 0.002 |
| <i>rpmF</i>  | Putative ribosomal protein | AFE_1903 | 1.1 | 0.002 |
| <i>rplY</i>  | Ribosomal protein L25      | AFE_2145 | 1.6 | 0.001 |
| <i>rpsF</i>  | Ribosomal protein S6       | AFE_2824 | 2.1 | 0.002 |
| <i>rpS18</i> | Ribosomal protein S18      | AFE_2823 | 0.8 | 0.004 |
| <i>rpsP</i>  | Ribosomal protein S16      | AFE_2855 | 0.9 | 0.017 |
| <i>rpsI</i>  | Ribosomal protein S9       | AFE_3074 | 1.5 | 0.018 |
| <i>rplM</i>  | Ribosomal protein L13      | AFE_3075 | 2.0 | 0.001 |

**Amino acid metabolism and transport**

|             |                                                                         |          |     |       |
|-------------|-------------------------------------------------------------------------|----------|-----|-------|
| <i>metE</i> | 5-methyltetrahydropteroyltri-glutamate-homocysteine S-methyltransferase | AFE_0288 | 1.1 | 0.006 |
| <i>cysI</i> | sulfite reductase (NADPH) hemoprotein beta-component                    | AFE_3122 | 0.9 | 0.019 |
| <i>cysH</i> | Adenylylsulfate reductase                                               | AFE_3123 | 1.5 | 0.008 |
| <i>dapA</i> | dihydrodipicolinate synthase                                            | AFE_2358 | 0.8 | 0.009 |

**Nucleotide biosynthesis and transport**

|             |                                        |          |     |       |
|-------------|----------------------------------------|----------|-----|-------|
| <i>purB</i> | adenylosuccinate lyase                 | AFE_2356 | 1.5 | 0.001 |
| <i>guaB</i> | inosine-5'-monophosphate dehydrogenase | AFE_1777 | 1.2 | 0.003 |

**Other genes**

|             |                                       |          |     |       |
|-------------|---------------------------------------|----------|-----|-------|
| <i>acpP</i> | Acyl carrier protein                  | AFE_1909 | 1.0 | 0.006 |
| <i>Fad</i>  | Fatty acid desaturase domain          | AFE_1964 | 1.3 | 0.001 |
| <i>yajC</i> | Pre-protein translocase, YajC subunit | AFE_2058 | 1.1 | 0.010 |

<sup>a</sup> Annotation No. is that of Genbank genome annotation NC011761.

<sup>b</sup> A 0.7 fold deviations from the 1:1 hybridization ( $\log_2$ ) ratio are taken as indicative of differential gene expression.

<sup>c</sup> Info on T-test and significance.

<sup>d</sup> The gene is in COG designation S (function unknown) but is included due to its gene context.

**Fig. S1.** Representative aerobic (A) and anaerobic (B) *Acidithiobacillus ferrooxidans* 2D-PAGE soluble protein gel and insets giving comparisons between aerobic (C) and anaerobic gels (D). 200  $\mu$ g protein was applied to each gel. Differentially expressed protein spots circled (numbers refer to the spot IDs in Supplemental Table 1).

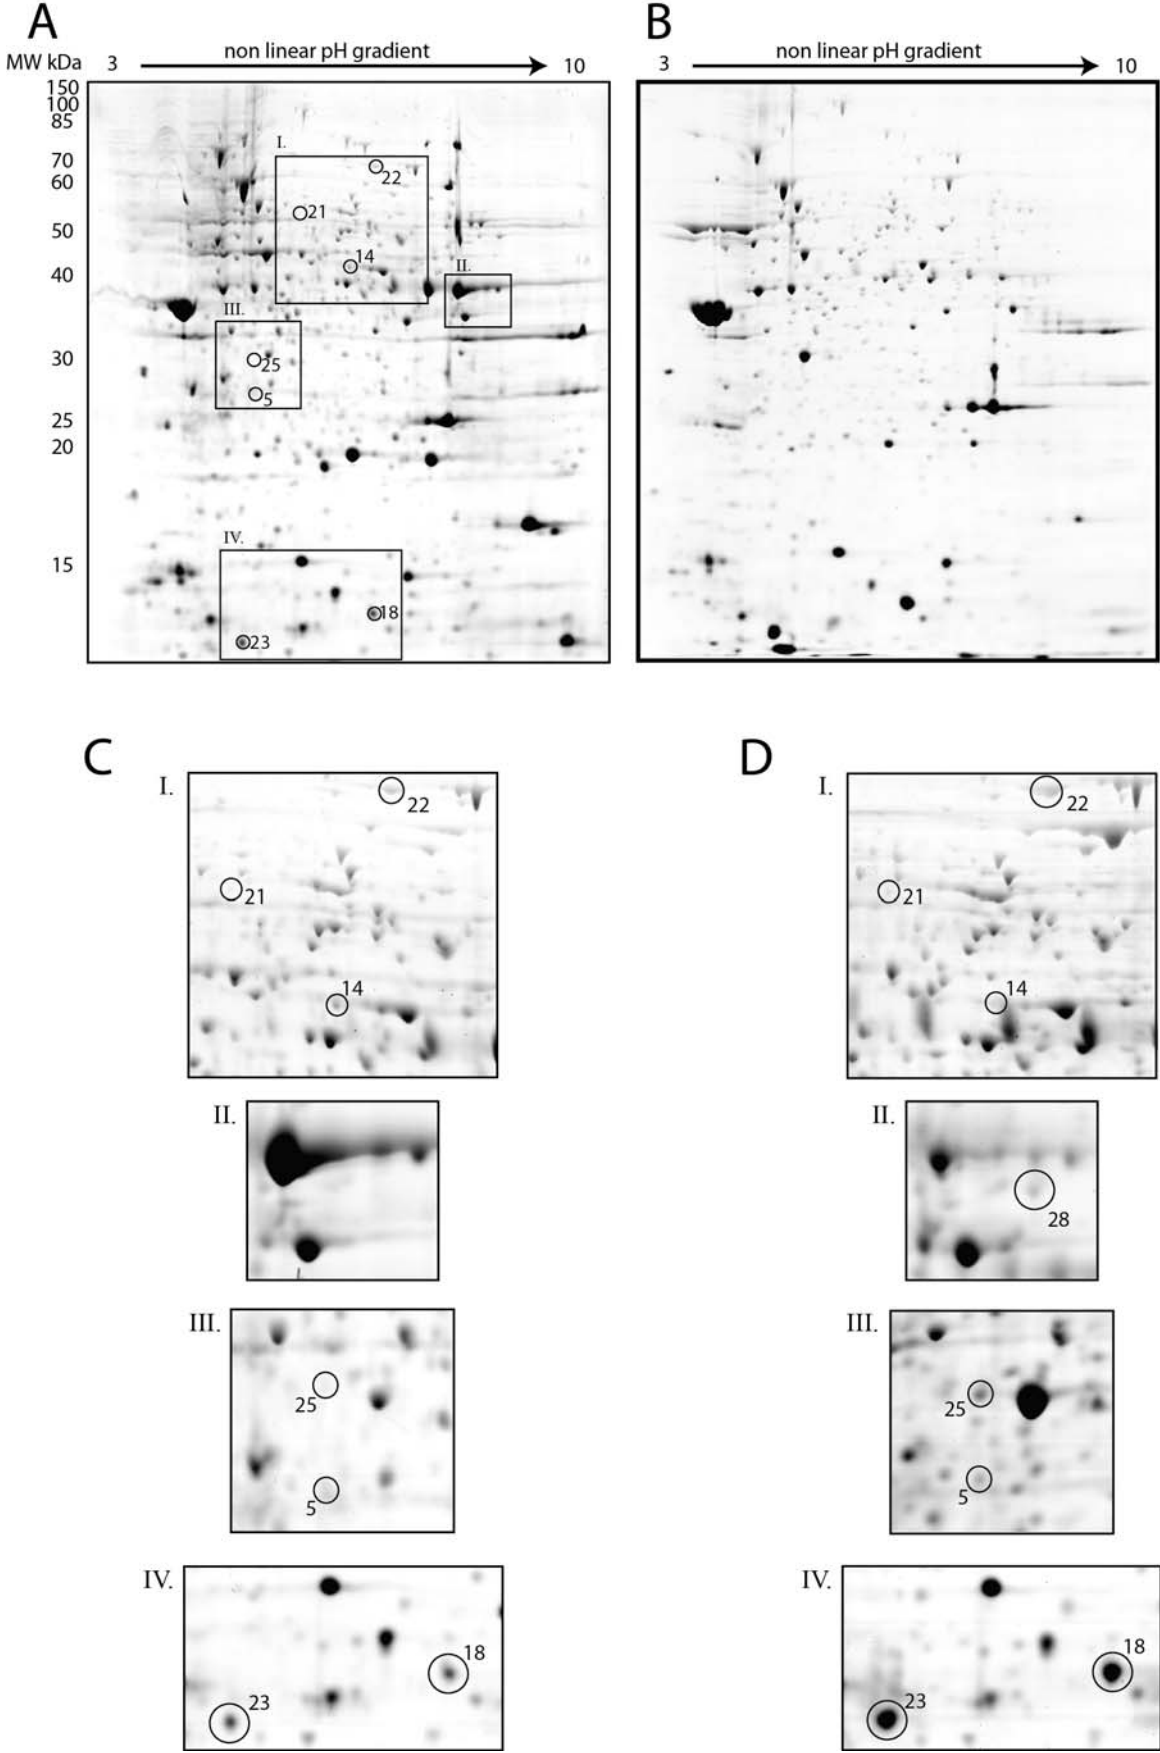

**Fig. S2.** Representative outer membrane protein enriched fraction (200  $\mu$ g protein applied to each gel) of *Acidithiobacillus ferrooxidans* cultured aerobically (A) and anaerobically (B). Differentially expressed protein spots in (A) and (B) are circled with numbers referring to the spot IDs in Supplemental Table 1. In part A, only the spots which are up-regulated in aerobic conditions are shown whereas part B displays spots up-regulated in anaerobic conditions. A train of protein spots (OMPP1/FadL/TodX family protein, indicated by solid arrows in B) as well as one large spot (major outer membrane protein 40, indicated by open arrow in A, B) stand out against the general protein pattern. To avoid a skewed analysis of membrane enriched gels, five spots (arrowed with an asterisk) were excluded from the analysis.

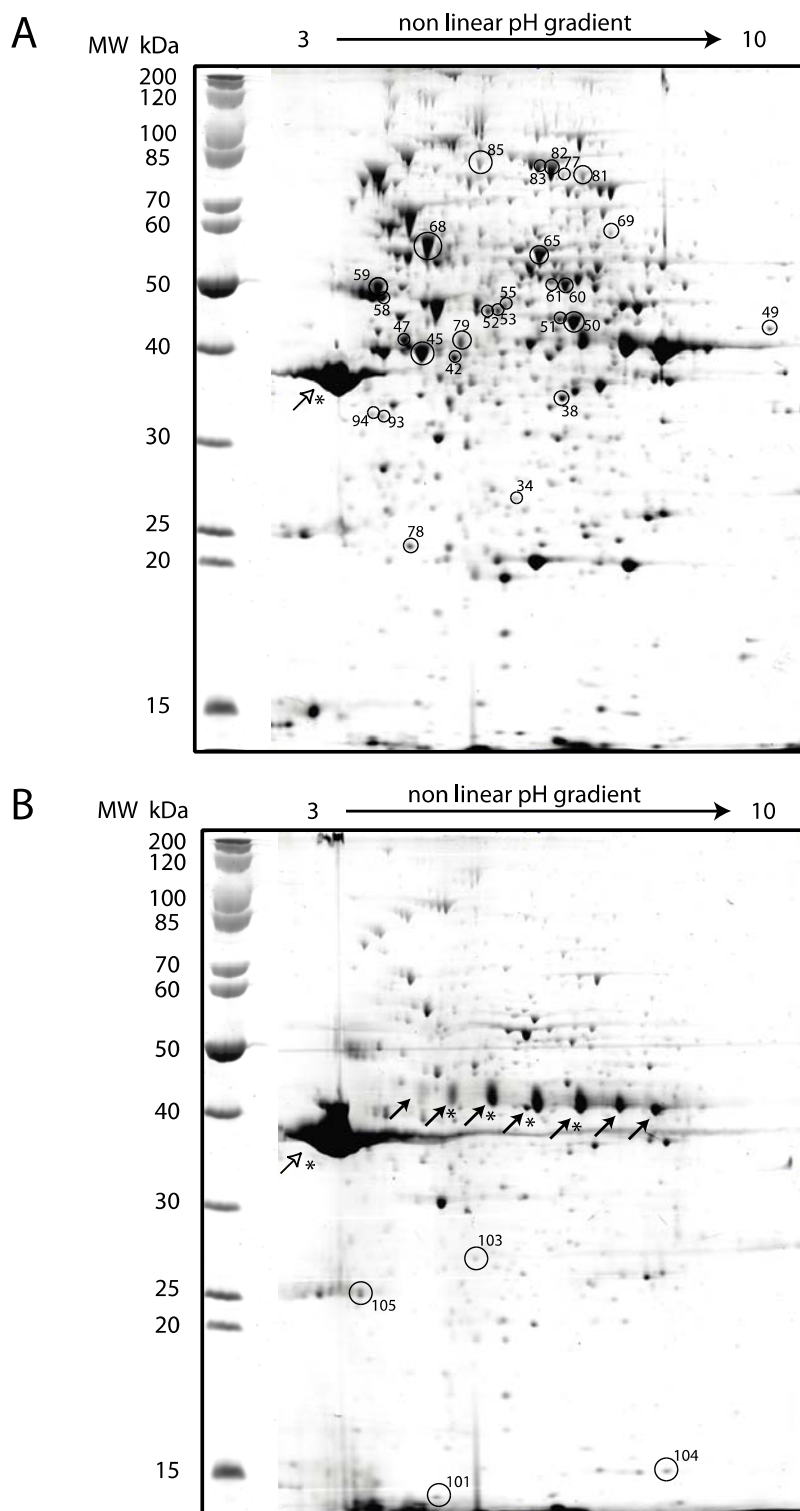

**Fig. S3.** Predicted genes and operons of energy metabolism and carbon management up-regulated in aerobic (red) and anaerobic (green) conditions. Genes that were not differentially expressed are in grey.

Heterodisulfide reductase complex

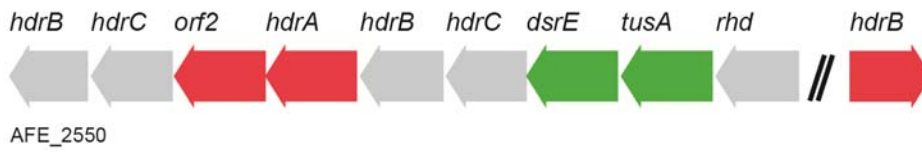

*Rus* operon

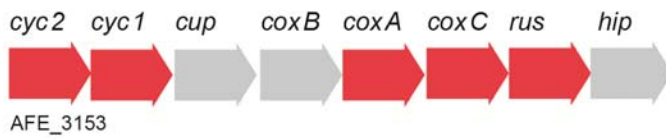

*PetII* operon

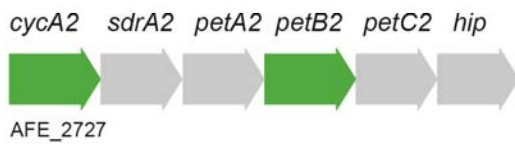

ATP synthase operon

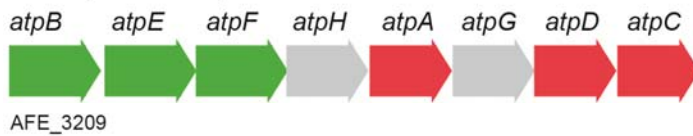

*cbb1* operon

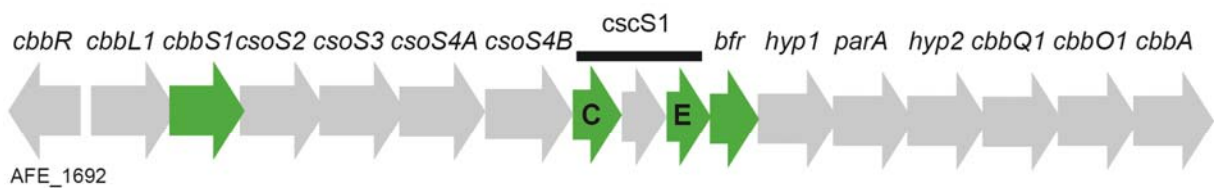

*cbb2* operon

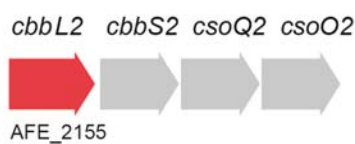

*cbb4*

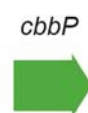

Supplement: AEM.03057-12_zam999104240so1.pdf [file AEM.03057-12_zam999104240so1.pdf]
